# Supplementary figures and images for: Machine Learning-Based Classification of Lignocellulosic Biomass from Pyrolysis-Molecular Beam Mass Spectrometry Data
Source: MDPI journal article supplement (doi:10.3390/ijms22084107), 2021-04-15

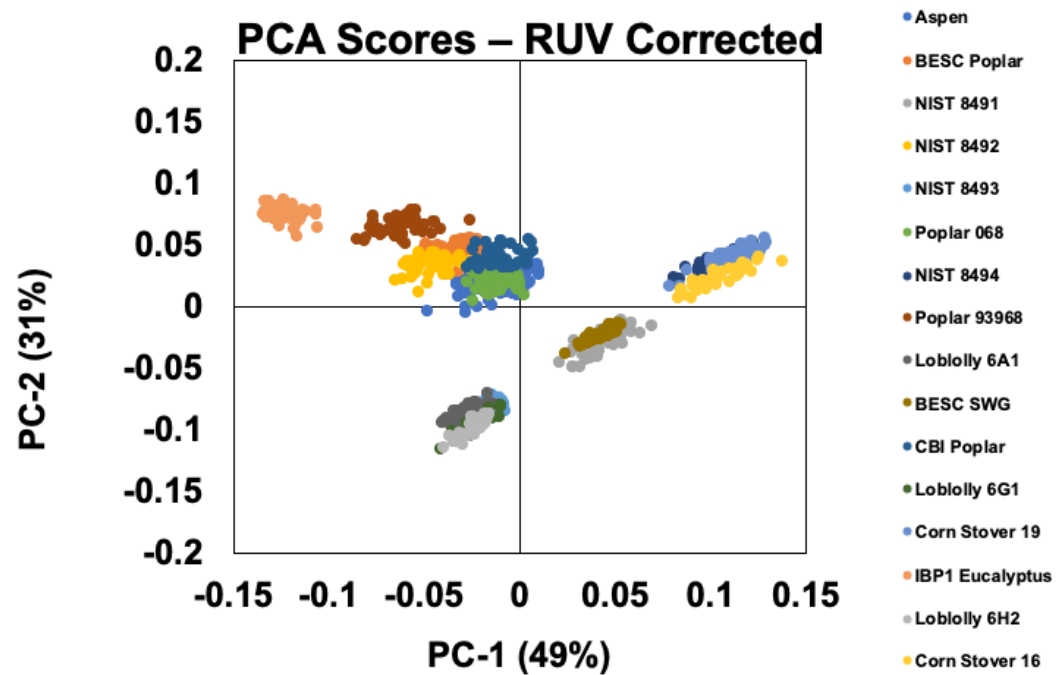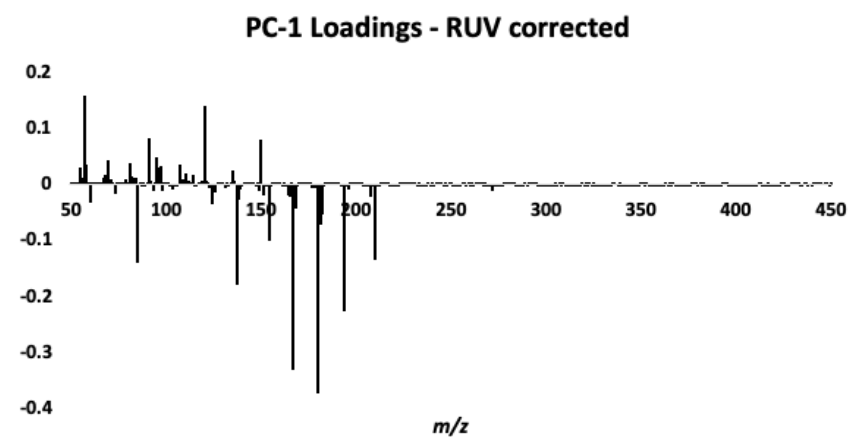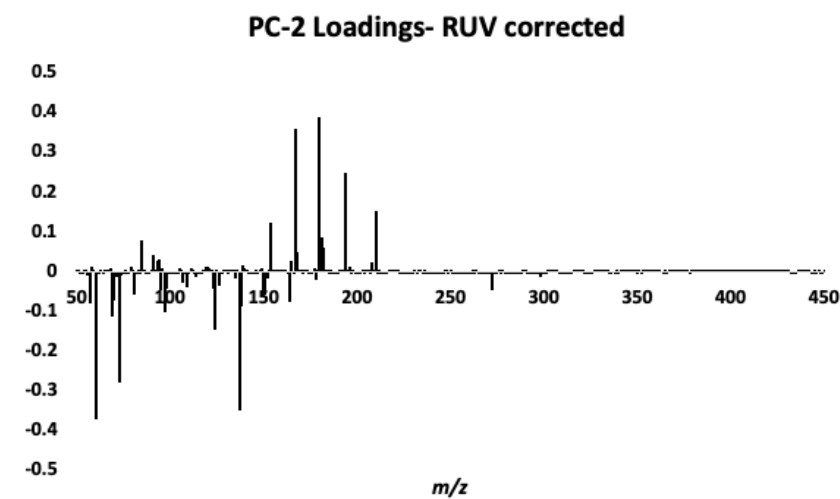

Supplement: s1 [file s1]
